# Supplementary material for: A general approach to multicomponent metal-decorated crumpled reduced graphene oxide nanocomposites using a flame-based process
Source: Royal Society of Chemistry journal article supplement (doi:10.1039/c9nr05792g), 2019-01-01
Supplement: c9nr05792g1.pdf [file c9nr05792g1.pdf]

Supplementary Information for:

**A general approach to multicomponent metal-decorated  
crumpled reduced graphene oxide nanocomposites using a  
flame-based process**

*Mohammad Moein Mohammad<sup>a</sup>, Shikuan Shao<sup>a</sup>, Santosh Srivatsa Guntur<sup>a</sup>, Anirudh  
Ravi Raghavan<sup>a</sup>, Naveshkaanth Alexander<sup>a</sup> Yang, Liu<sup>b</sup>, Christopher M. Stafford<sup>c</sup>,  
Raymond D. Buchner<sup>a</sup>, Mark T. Swihart<sup>a\*</sup>*

<sup>a</sup>Department of Chemical and Biological Engineering, University at Buffalo, The State  
University of New York, Buffalo, NY 14260, USA

<sup>b</sup>Department of Chemistry, Indiana University, Bloomington, IN 47405, USA.

<sup>c</sup>Materials Science and Engineering Division, National Institute of Standards and  
Technology, Gaithersburg, MD 20899, USA

\*[swihart@buffalo.edu](mailto:swihart@buffalo.edu)

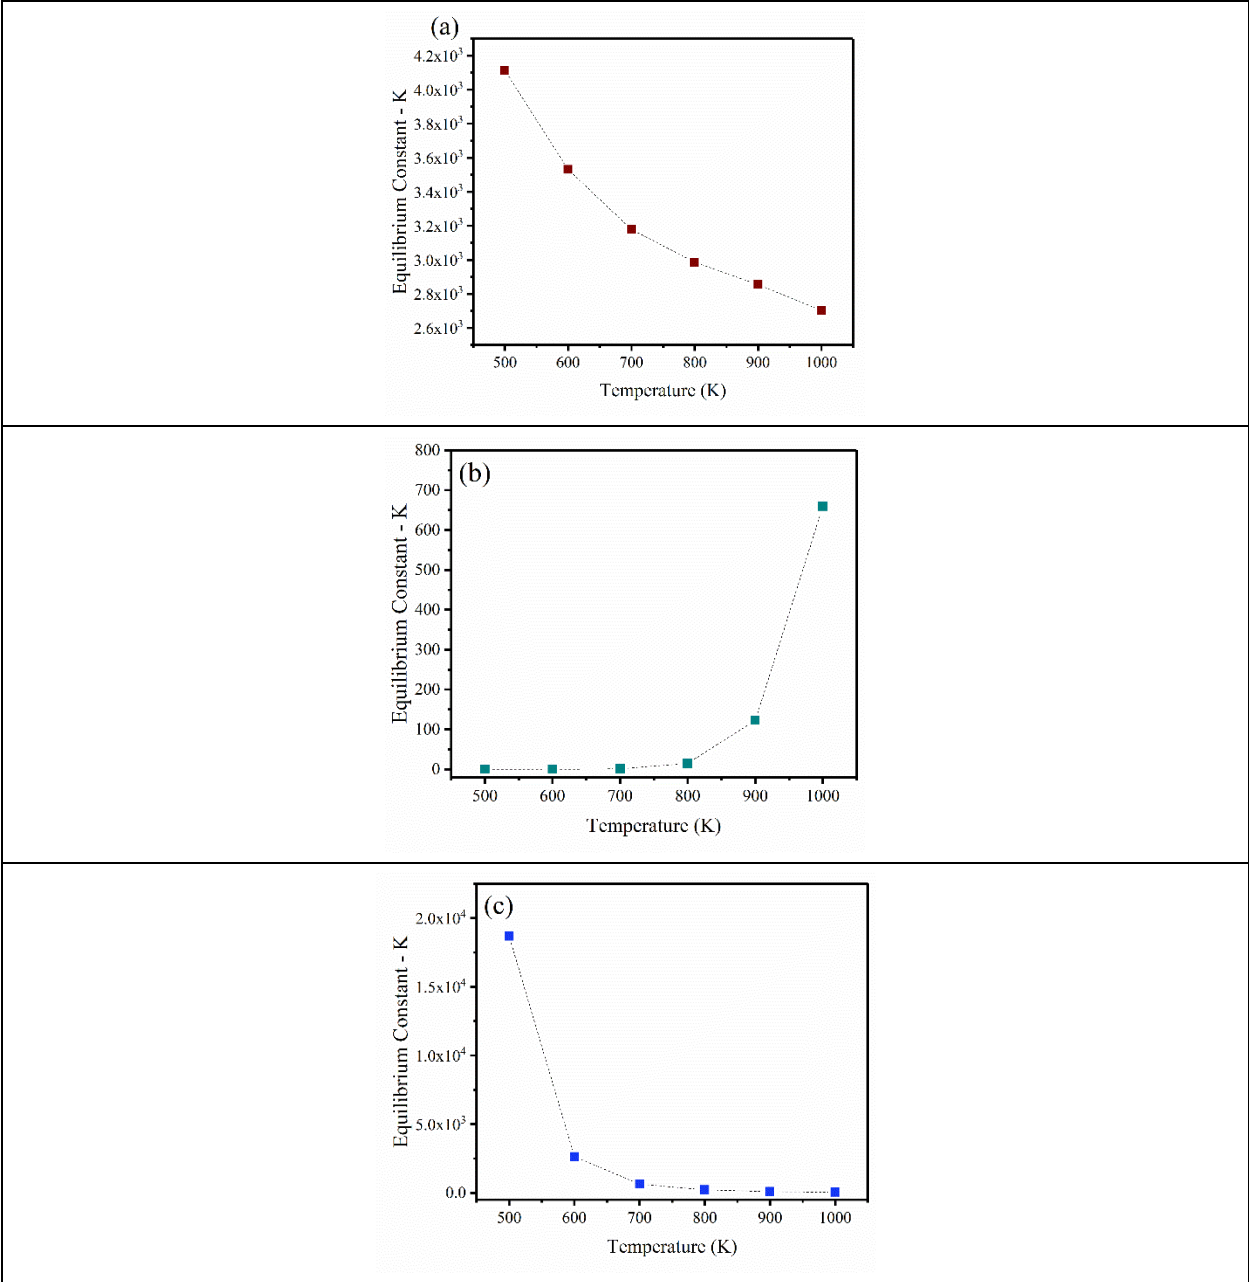

**Fig. S1:** Equilibrium constant vs. temperature for cobalt reduction in the presence of water with: **a)** hydrogen; **b)** graphitized carbon; **c)** carbon monoxide. (data from Table S2 were used for calculating the equilibrium constants)

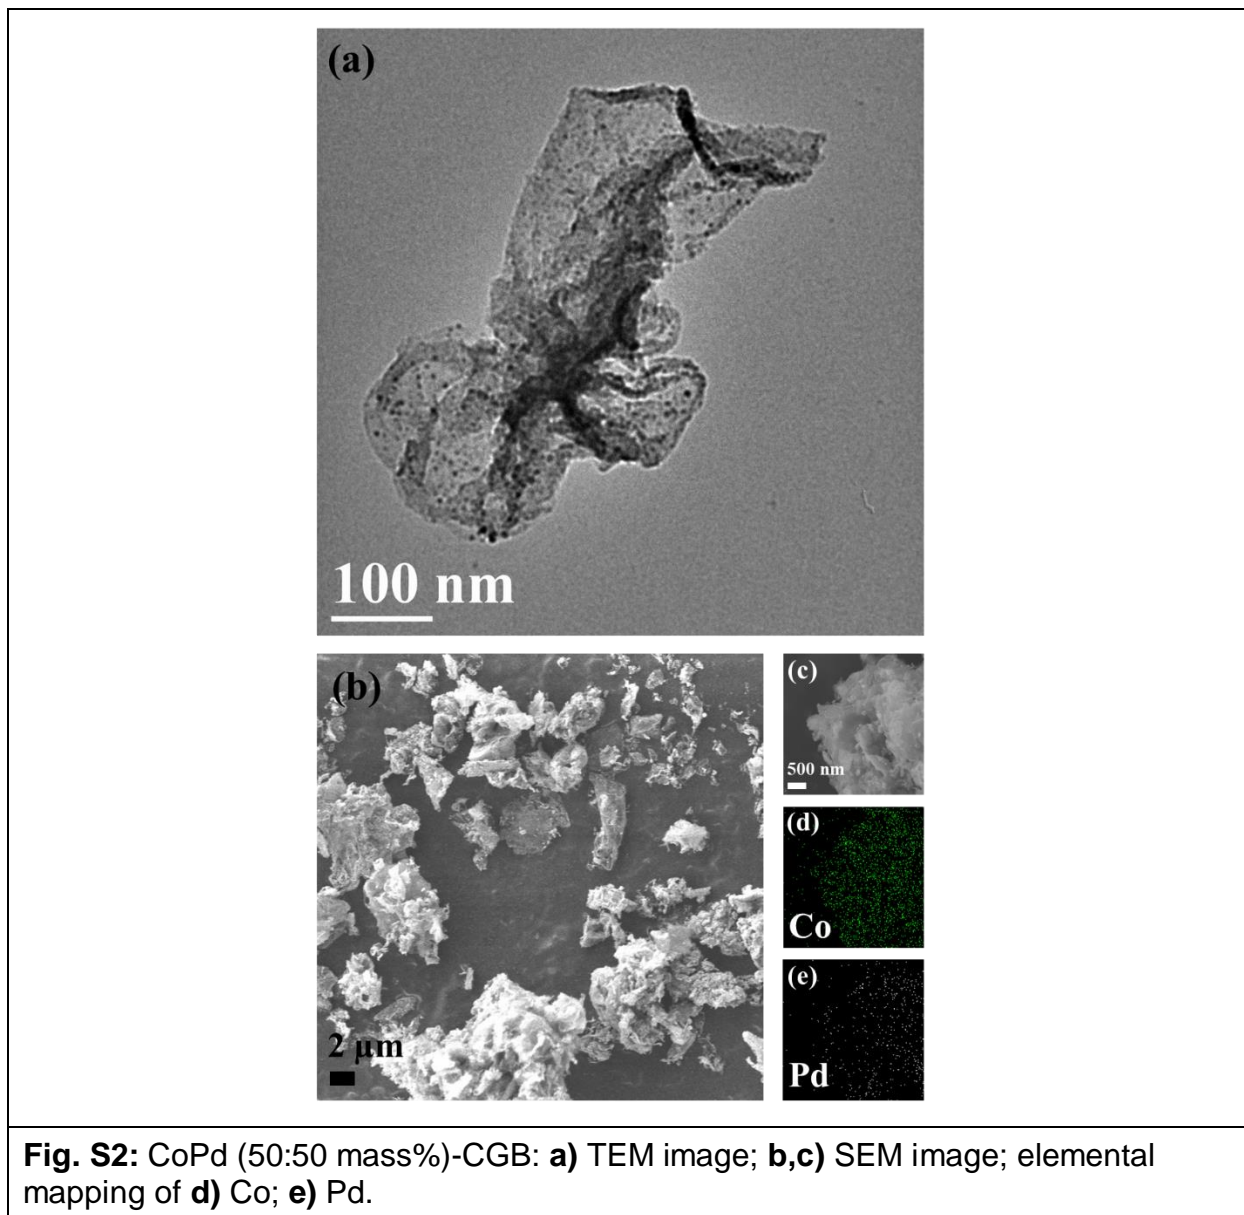

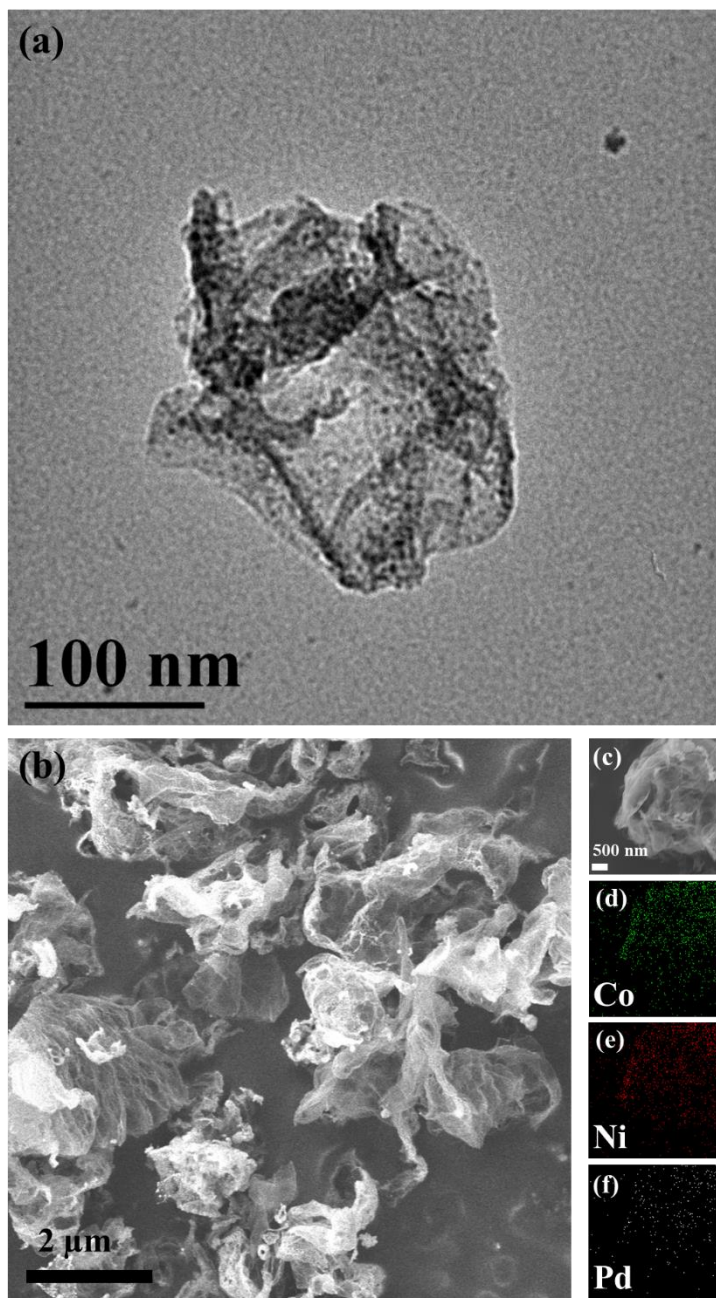

**Fig. S3:** CoNiPd (33:33:34 mass%)-CGB: **a)** TEM image; **b,c)** SEM image; elemental mapping of **d)** Co; **e)** Ni; **f)** Pd.

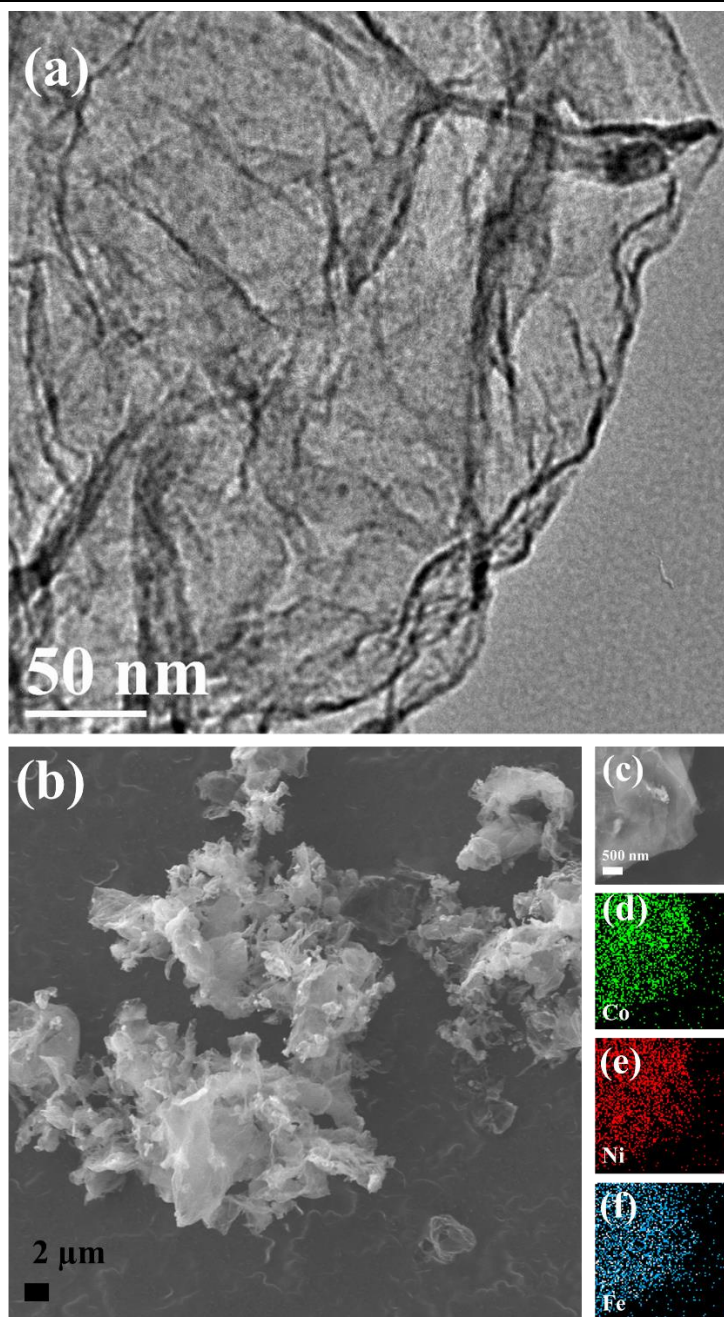

**Fig. S4:** CoNiFe (33:33:34 mass%)-CGB: **a)** TEM image; **b,c)** SEM image; elemental mapping of **d)** Co; **e)** Ni; **f)** Fe.

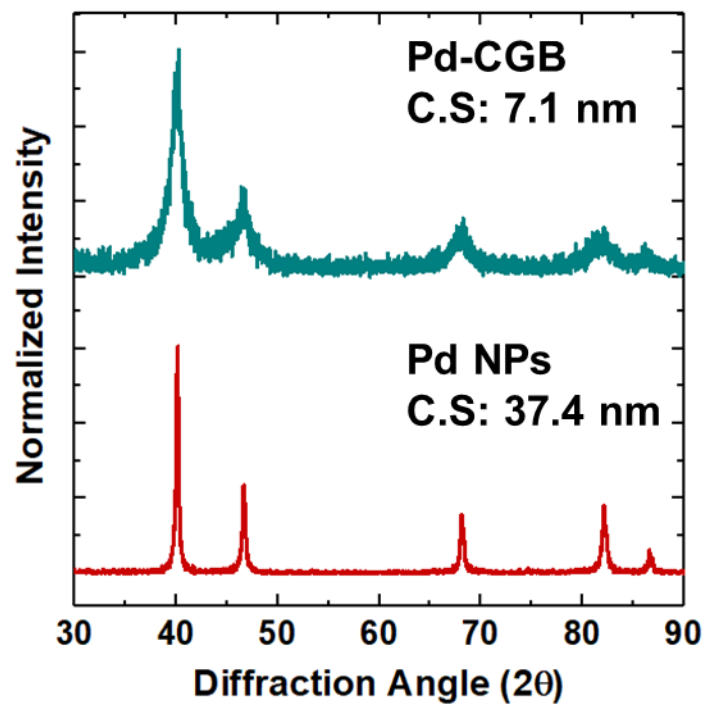

**Fig. S5:** XRD patterns of Pd-CGB and Pd nanoparticles synthesized using the HTRJ process. (C.S: Crystalline Size)

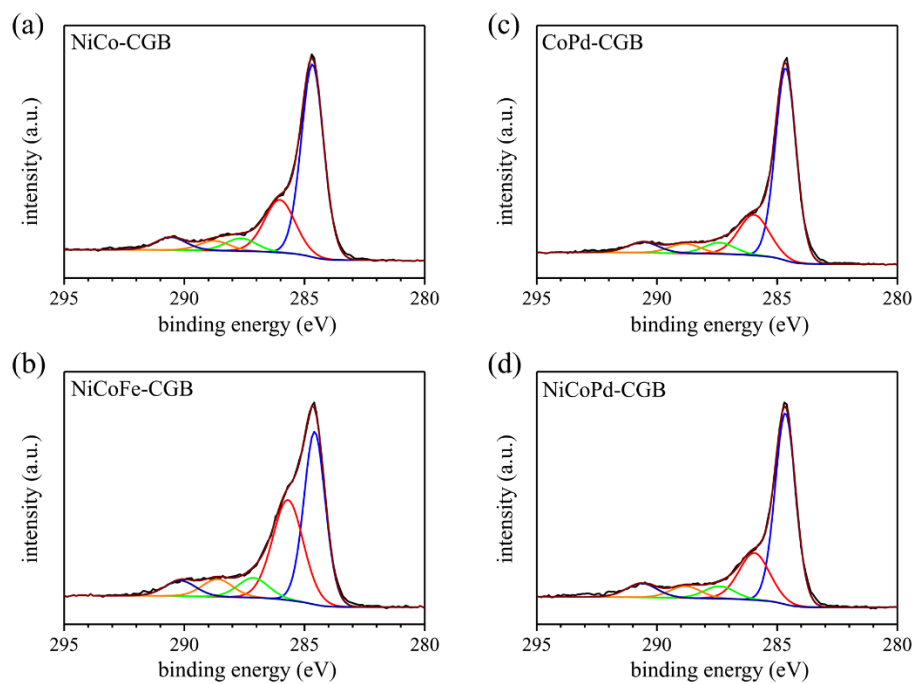

**Fig. S6:** C 1s spectra of M-CGB: **a)** NiCo-CGB; **b)** NiCoFe-CGB; **c)** CoPd-CGB; and **d)** NiCoPd-CGB.

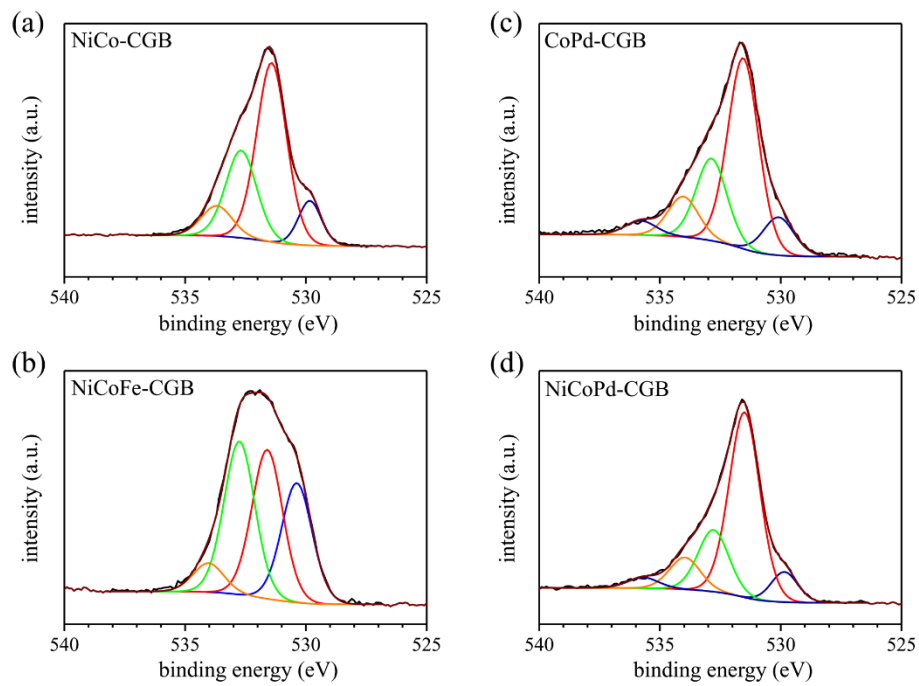

**Fig. S7:** O 1s spectra of M-CGB: **a)** NiCo-CGB; **b)** NiCoFe-CGB; **c)** CoPd-CGB; and **d)** NiCoPd-CGB.



**Table S1.** XPS element contents (at. %) of GO, CGB, and M-CGBs

| Material       | C 1s       | O 1s       | N 1s      | Co 2p     | Ni 2p     | Pd 3d     | Fe 2p     |
|----------------|------------|------------|-----------|-----------|-----------|-----------|-----------|
| GO             | 70.30±0.72 | 29.06±0.92 | 0.64±0.38 | -         | -         | -         | -         |
| CGB            | 81.37±2.90 | 15.06±2.42 | 3.57±0.50 | -         | -         | -         | -         |
| CoNi-CGB       | 59.76±3.18 | 29.91±5.53 | 3.51±0.75 | 3.39±0.88 | 3.43±1.05 | -         | -         |
| CoPd-CGB       | 64.90±6.53 | 27.26±7.08 | 1.66±0.56 | 3.46±0.46 | -         | 2.72±0.53 | -         |
| CoNiFe-<br>CGB | 58.39±5.88 | 31.87±4.47 | 3.63±0.36 | 2.24±0.37 | 1.94±0.29 | -         | 1.93±0.89 |
| CoNiPd-<br>CGB | 64.04±3.67 | 26.74±3.65 | 2.23±0.41 | 2.91±0.75 | 2.36±0.41 | 1.69±0.27 | -         |

\*Uncertainties based on mean ±2 standard deviations

| Table S2. Phase thermochemistry data for calculating the equilibrium constants of cobalt reduction reactions |          |                        |                         |                    |            |           |           |          |           |            |           |                     |
|--------------------------------------------------------------------------------------------------------------|----------|------------------------|-------------------------|--------------------|------------|-----------|-----------|----------|-----------|------------|-----------|---------------------|
| Species                                                                                                      | Phase    | $\Delta H_f$<br>kJ/mol | Entropy<br>J/(mol<br>K) | Shomate Parameters |            |           |           |          |           |            |           |                     |
|                                                                                                              |          |                        |                         | A                  | B          | C         | D         | E        | F         | G          | H         | T range (K)         |
| CoO                                                                                                          | solid    | -237.74                | 52.85                   | 43.65              | 22.38373   | -16.89386 | 6.556161  | 0.532263 | -249.8643 | 102.6892   | -237.7353 | 298-1600            |
| Co                                                                                                           | solid    | 0                      | 30.07                   | 10.9943            | 54.375     | -55.5132  | 25.817    | 0.164533 | -4.7033   | 30.3258    | 0         | 298-700             |
|                                                                                                              |          |                        |                         | -204.576           | 515.582    | -421.55   | 129.558   | 17.9267  | 94.6155   | -272.856   | 0         | 700-1394            |
| Co                                                                                                           | liquid   | 18                     | 41                      | 45.61355           | -3.806989  | 1.031499  | -0.096701 | -3.33274 | -8.135203 | 78.01905   | 18.004    | 1768. -<br>3184.943 |
| C                                                                                                            | graphite | 0                      | 5.6                     | 4.487119045        |            |           |           |          |           |            |           |                     |
| CO                                                                                                           | gas      | -110.53                | 197.66                  | 25.56759           | 6.09613    | 4.054656  | -2.671301 | 0.131021 | -118.0089 | 227.3665   | -110.5271 | 298-1300            |
| CO <sub>2</sub>                                                                                              | gas      | -393.52                | 213.79                  | 24.99735           | 55.18696   | -33.69137 | 7.948387  | -0.13664 | -403.6075 | 228.2431   | -393.5224 | 298-1200            |
| H <sub>2</sub>                                                                                               | gas      | 0                      | 130.68                  | 33.066178          | -11.363417 | 11.432816 | -2.772874 | -0.15856 | -9.980797 | 172.707974 | 0         | 298-1000            |
| H <sub>2</sub> O                                                                                             | gas      | -241.83                | 188.84                  | 30.092             | 6.832514   | 6.793435  | -2.53448  | 0.082139 | -250.881  | 223.3967   | -241.8264 | 500-1700            |

Data from: *NIST Chemistry WebBook, SRD 69*. National Institute of Standard and Technology (NIST), U.S. Department of Commerce.
